# Supplementary material
Source: PubMed Central journal article supplement (PMC8455257)
Supplement: ASN.2020101531SupplementaryData.pdf [file ASN.2020101531SupplementaryData.pdf]

## Supplemental Table of Contents

**Figure S1:** Hazard ratio for all-cause mortality by TSAT, with TSAT as a linear spline with one knot at 40%.

**Figure S2:** Hazard ratio for major adverse cardiovascular events (MACE) by TSAT, with TSAT as a linear spline with one knot at 40%.

**Supplementary Table 1:** Number (%) of patients who died (all-cause) prior to kidney replacement therapy (KRT), or who were censored due to KRT or other causes (patient departure or end of study data collection).

**Supplementary Table 2:** Hazard ratios (HR) for all-cause mortality and MACE by TSAT and ferritin levels, in subgroups with and without anemia (hemoglobin <12 vs  $\geq$ 12 g/dL).

**Supplementary Table 3:** Hazard ratios (HR) for all-cause mortality by categorical, cross-classified TSAT and ferritin. Reference group is TSAT 26-35% and ferritin 100-299 ng/mL.

Figure S1

Hazard ratio for all-cause mortality by TSAT, with TSAT as a linear spline with one knot at 40%.

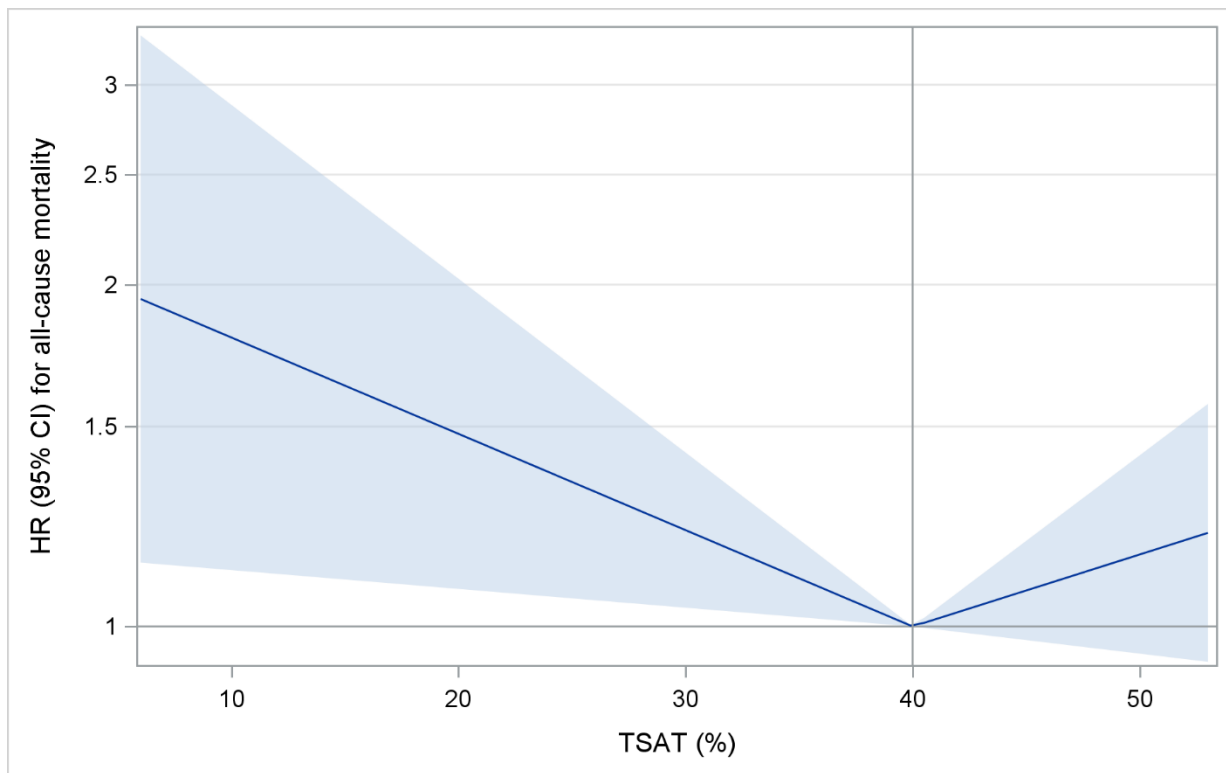

The x-axis ranges from TSAT = 6% to 53%, corresponding to the 1<sup>st</sup> and 99<sup>th</sup> percentiles, though all data were used when fitting the Cox model.

Figure S2

Hazard ratio for major adverse cardiovascular events (MACE) by TSAT, with TSAT as a linear spline with one knot at 40%.

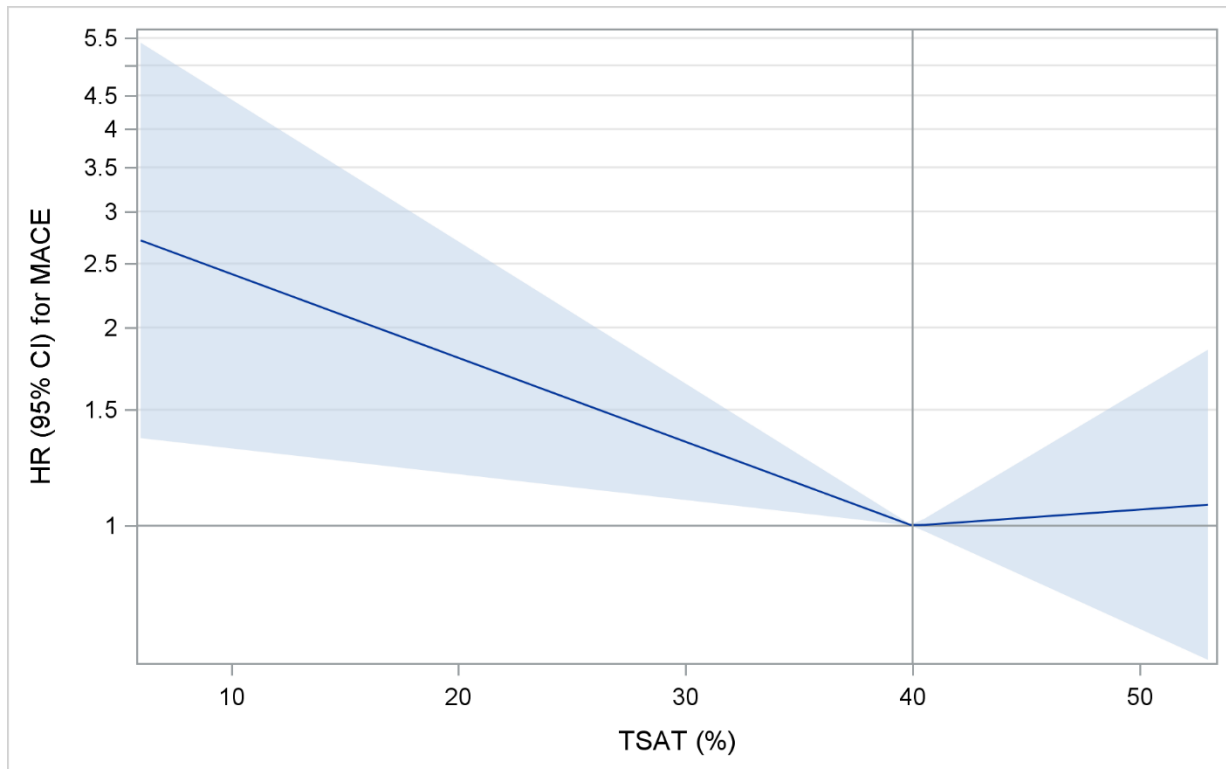

The x-axis ranges from TSAT = 6% to 53%, corresponding to the 1<sup>st</sup> and 99<sup>th</sup> percentiles, though all data were used when fitting the Cox model.

### Supplementary Table 1

Number (%) of patients who died (all-cause) prior to kidney replacement therapy (KRT), or who were censored due to KRT or other causes (patient departure or end of study data collection).

| Exposure                | N    | Outcome event/censoring |            |            |
|-------------------------|------|-------------------------|------------|------------|
|                         |      | Death pre-KRT           | KRT        | Other      |
| <b>TSAT (%)</b>         |      |                         |            |            |
| <b>≤15</b>              | 926  | 152 (16%)               | 221 (24%)  | 553 (60%)  |
| <b>16-20</b>            | 1067 | 127 (12%)               | 240 (22%)  | 700 (66%)  |
| <b>21-25</b>            | 1178 | 155 (13%)               | 225 (19%)  | 797 (68%)  |
| <b>26-35</b>            | 1408 | 131 (9%)                | 281 (20%)  | 997 (71%)  |
| <b>36-45</b>            | 428  | 30 (7%)                 | 77 (18%)   | 321 (75%)  |
| <b>≥46</b>              | 138  | 18 (13%)                | 28 (20%)   | 92 (66%)   |
| <b>Ferritin (ng/mL)</b> |      |                         |            |            |
| <b>&lt;50</b>           | 777  | 107 (14%)               | 115 (15%)  | 555 (71%)  |
| <b>50-99</b>            | 1201 | 130 (11%)               | 254 (21%)  | 817 (68%)  |
| <b>100-299</b>          | 2236 | 243 (11%)               | 481 (22%)  | 1511 (68%) |
| <b>≥300</b>             | 931  | 132 (14%)               | 222 (24%)  | 577 (62%)  |
| <b>Total</b>            | 5145 | 613 (12%)               | 1072 (21%) | 3460 (67%) |

## Supplementary Table 2

Hazard ratios (HR) for all-cause mortality and MACE by TSAT and ferritin levels, in subgroups with and without anemia (hemoglobin <12 vs ≥12 g/dL).

| Outcome                 | Exposure                | With anemia     |                  | Without anemia   |                  |                  |
|-------------------------|-------------------------|-----------------|------------------|------------------|------------------|------------------|
|                         |                         | N (%)           | HR (95% CI)      | N (%)            | HR (95% CI)      |                  |
| All-cause mortality     | <b>TSAT (%)</b>         |                 |                  |                  |                  |                  |
|                         | ≤15                     | 575 (25%)       | 1.59 (1.02,2.48) | 351 (12%)        | 1.47 (0.90,2.39) |                  |
|                         | 16-20                   | 503 (22%)       | 1.17 (0.80,1.72) | 564 (20%)        | 1.29 (0.84,1.99) |                  |
|                         | 21-25                   | 506 (22%)       | 1.30 (0.91,1.86) | 672 (24%)        | 1.31 (0.88,1.94) |                  |
|                         | 26-35                   | 510 (22%)       | 1 (ref)          | 899 (32%)        | 1 (ref)          |                  |
|                         | 36-45                   | 143 (6%)        | 0.93 (0.47,1.82) | 285 (10%)        | 0.59 (0.30,1.15) |                  |
|                         | ≥46                     | 64 (3%)         | 1.14 (0.54,2.41) | 74 (3%)          | 1.95 (0.87,4.35) |                  |
|                         | <b>Ferritin (ng/mL)</b> |                 |                  |                  |                  |                  |
|                         | <50                     | 353 (15%)       | 0.75 (0.51,1.11) | 424 (15%)        | 1.29 (0.93,1.79) |                  |
|                         | 50-99                   | 489 (21%)       | 0.95 (0.68,1.33) | 712 (25%)        | 0.98 (0.71,1.35) |                  |
|                         | 100-299                 | 942 (41%)       | 1 (ref)          | 1293 (45%)       | 1 (ref)          |                  |
|                         | ≥300                    | 514 (22%)       | 1.18 (0.90,1.56) | 417 (15%)        | 1.32 (0.86,2.04) |                  |
|                         | MACE                    | <b>TSAT (%)</b> |                  |                  |                  |                  |
|                         |                         | ≤15             | 283 (23%)        | 2.72 (1.59,4.65) | 200 (11%)        | 1.39 (0.69,2.81) |
| 16-20                   |                         | 258 (21%)       | 1.55 (0.83,2.88) | 325 (18%)        | 1.22 (0.67,2.24) |                  |
| 21-25                   |                         | 257 (21%)       | 1.97 (1.17,3.33) | 430 (24%)        | 1.30 (0.76,2.22) |                  |
| 26-35                   |                         | 289 (24%)       | 1 (ref)          | 591 (33%)        | 1 (ref)          |                  |
| 36-45                   |                         | 91 (7%)         | 0.77 (0.27,2.15) | 200 (11%)        | 0.64 (0.28,1.51) |                  |
| ≥46                     |                         | 39 (3%)         | 0.44 (0.06,3.14) | 53 (3%)          | 1.45 (0.55,3.81) |                  |
| <b>Ferritin (ng/mL)</b> |                         |                 |                  |                  |                  |                  |
| <50                     |                         | 182 (15%)       | 0.92 (0.53,1.59) | 249 (14%)        | 0.88 (0.52,1.49) |                  |
| 50-99                   |                         | 249 (20%)       | 0.79 (0.52,1.21) | 459 (25%)        | 0.99 (0.66,1.50) |                  |
| 100-299                 |                         | 510 (42%)       | 1 (ref)          | 836 (46%)        | 1 (ref)          |                  |
| ≥300                    |                         | 276 (23%)       | 1.04 (0.64,1.69) | 256 (14%)        | 1.16 (0.81,1.64) |                  |

Results based on Cox models – one for all-cause mortality and one for MACE – with the following adjustments: country, age, sex, Black race, BMI, eGFR, albuminuria, ESA use, 11 summary comorbidities, serum albumin, and white blood cell count. For all-cause mortality, the sample includes patients from Brazil, France, Germany, and the US. For MACE, the sample patients from Brazil, France, and the US.

### Supplementary Table 3

Hazard ratios (HR) for all-cause mortality by categorical, cross-classified TSAT and ferritin. Reference group is TSAT 26-35% and ferritin 100-299 ng/mL.

| HR<br>(95% CI)<br>N (%) |         | TSAT (%)                          |                                  |                                 |                                 |                                |
|-------------------------|---------|-----------------------------------|----------------------------------|---------------------------------|---------------------------------|--------------------------------|
|                         |         | ≤20                               | 21-25                            | 26-35                           | 36-45                           | ≥46                            |
| Ferritin (ng/mL)        | ≥300    | 1.71<br>(1.16,2.54)<br>213 (4%)   | 1.59<br>(0.98,2.56)<br>186 (4%)  | 1.27<br>(0.80,2.00)<br>345 (7%) | 1.11<br>(0.61,2.03)<br>124 (2%) | 1.79<br>(0.80,3.99)<br>62 (1%) |
|                         | 100-299 | 1.44<br>(0.98,2.10)<br>695 (14%)  | 1.34<br>(0.88,2.05)<br>579 (11%) | 1<br>(ref)<br>703 (14%)         | 0.84<br>(0.46,1.50)<br>215 (4%) | 1.74<br>(0.50,6.09)<br>44 (1%) |
|                         | <100    | 1.34<br>(0.97,1.85)<br>1084 (21%) | 1.42<br>(0.95,2.14)<br>413 (8%)  | 1.21<br>(0.75,1.94)<br>361 (7%) | 0.51<br>(0.15,1.79)<br>89 (2%)  | 1.61<br>(0.43,6.02)<br>32 (1%) |

Each cell shows the HR (95% CI) and the N (%) of patients. Results based on a Cox model with the following adjustments: country, age, sex, Black race, BMI, eGFR, albuminuria, ESA use, 11 summary comorbidities, serum albumin, white blood cell count, and hemoglobin.
